# Supplementary material
Source: Springer Nature journal article supplement (https://www.springermedizin.de/resource/supplementary/12877_2011_767_MOESM1_ESM.pdf/9440284)

# Kaplan-Meier survival estimates

men

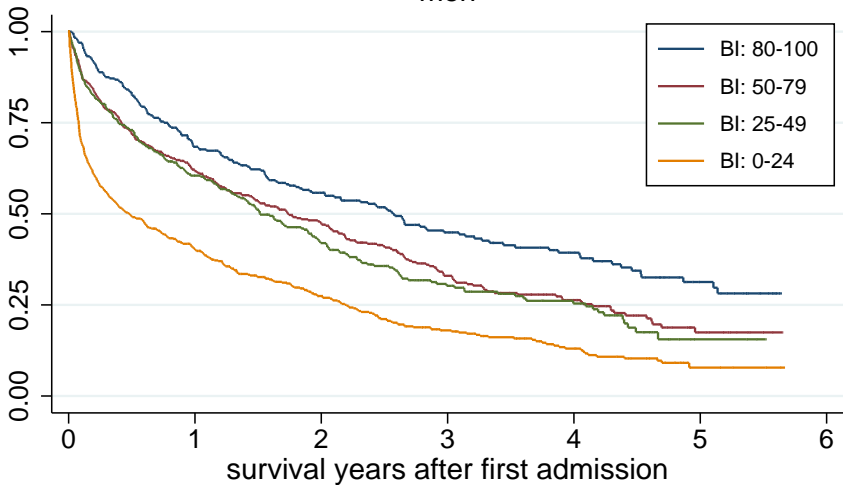

Number at risk

|            |     |     |     |    |    |    |
|------------|-----|-----|-----|----|----|----|
| BI: 80-100 | 296 | 194 | 137 | 85 | 53 | 20 |
| BI: 50-79  | 452 | 256 | 160 | 87 | 50 | 12 |
| BI: 25-49  | 363 | 198 | 113 | 58 | 34 | 3  |
| BI: 0-24   | 542 | 207 | 115 | 61 | 32 | 5  |

Supplement: MOESM1 [file 9440284]
